# Supplementary material
Source: publisher figshare collection journal article supplement (https://tandf.figshare.com/articles/dataset/_/24792569)
Supplement: Supplementary file 1 [file 1]

Table S1. Effect of preharvest feeding by *Leptoglossus occidentalis* on *Pinus thunbergii* seeds

| Tree  | Lo treatment    |              |      |                         |     |                         | Control |                 |              |      |                         |     |                         |      |
|-------|-----------------|--------------|------|-------------------------|-----|-------------------------|---------|-----------------|--------------|------|-------------------------|-----|-------------------------|------|
|       | No. of<br>cones | No. of seeds |      | Mean                    |     | Sunken seed<br>rate (%) |         | No. of<br>cones | No. of seeds |      | Mean                    |     | Sunken seed<br>rate (%) |      |
|       |                 |              |      | weight of<br>seeds (mg) |     |                         |         |                 |              |      | weight of<br>seeds (mg) |     |                         |      |
|       |                 | Mean $\pm$   | SD   | Mean $\pm$              | SD  | Mean $\pm$              | SD      |                 | Mean $\pm$   | SD   | Mean $\pm$              | SD  |                         |      |
| A     | 4               | 25.5 $\pm$   | 10.5 | 9.9 $\pm$               | 1.9 | 30.1 $\pm$              | 6.1     | 5               | 33.0 $\pm$   | 16.5 | 11.9 $\pm$              | 2.7 | 47.5 $\pm$              | 12.8 |
| B     | 5               | 50.0 $\pm$   | 12.1 | 11.1 $\pm$              | 1.2 | 9.0 $\pm$               | 4.8     | 5               | 51.0 $\pm$   | 2.3  | 12.3 $\pm$              | 1.2 | 20.1 $\pm$              | 6.5  |
| C     | 5               | 61.6 $\pm$   | 14.5 | 12.9 $\pm$              | 2.5 | 15.3 $\pm$              | 12.1    | 5               | 61.2 $\pm$   | 11.9 | 15.9 $\pm$              | 4.0 | 33.8 $\pm$              | 17.6 |
| D     | 5               | 14.0 $\pm$   | 8.6  | 10.8 $\pm$              | 0.6 | 17.3 $\pm$              | 6.4     | 5               | 17.2 $\pm$   | 8.9  | 13.1 $\pm$              | 2.2 | 37.3 $\pm$              | 15.2 |
| E     | 5               | 44.2 $\pm$   | 25.4 | 15.8 $\pm$              | 1.5 | 30.8 $\pm$              | 18.4    | 5               | 43.8 $\pm$   | 21.6 | 17.1 $\pm$              | 3.6 | 49.6 $\pm$              | 29.3 |
| F     | 5               | 20.4 $\pm$   | 10.6 | 9.1 $\pm$               | 3.2 | 12.5 $\pm$              | 18.1    | 5               | 20.2 $\pm$   | 9.8  | 11.4 $\pm$              | 6.4 | 25.3 $\pm$              | 31.6 |
| Total | 29              | 36.3 $\pm$   | 22.2 | 11.7 $\pm$              | 2.9 | 18.8 $\pm$              | 14.1    | 30              | 37.7 $\pm$   | 20.2 | 13.6 $\pm$              | 4.0 | 35.6 $\pm$              | 21.9 |

Lo treatment: Five *L. occidentalis* were enclosed in a nonwoven fabric bag with a *P. thunbergii* cone.

Table S2. Effect of postharvest feeding by *Leptoglossus occidentalis* on *Pinus thunbergii* seeds

| Tree  | Lo treatment    |              |        |                              |       |                         | Control |                 |              |        |                              |       |                         |        |
|-------|-----------------|--------------|--------|------------------------------|-------|-------------------------|---------|-----------------|--------------|--------|------------------------------|-------|-------------------------|--------|
|       | No. of<br>cones | No. of seeds |        | Mean weight of<br>seeds (mg) |       | Sunken seed<br>rate (%) |         | No. of<br>cones | No. of seeds |        | Mean weight of<br>seeds (mg) |       | Sunken seed<br>rate (%) |        |
|       |                 | Mean         | ± SD   | Mean                         | ± SD  | Mean                    | ± SD    |                 | Mean         | ± SD   | Mean                         | ± SD  | Mean                    | ± SD   |
| G     | 19              | 25.2         | ± 21.5 | 15.6                         | ± 3.2 | 26.1                    | ± 17.8  | 19              | 29.1         | ± 20.7 | 17.2                         | ± 4.5 | 45.7                    | ± 28.2 |
| H     | 20              | 30.2         | ± 18.0 | 11.0                         | ± 2.2 | 8.0                     | ± 9.1   | 20              | 30.9         | ± 12.4 | 12.7                         | ± 1.9 | 19.4                    | ± 12.7 |
| I     | 19              | 25.9         | ± 12.6 | 11.1                         | ± 1.6 | 19.6                    | ± 11.6  | 20              | 28.8         | ± 16.5 | 11.4                         | ± 2.3 | 26.7                    | ± 16.3 |
| J     | 20              | 36.7         | ± 17.4 | 18.4                         | ± 3.9 | 54.2                    | ± 21.4  | 20              | 39.9         | ± 15.8 | 18.8                         | ± 4.2 | 60.6                    | ± 26.3 |
| K     | 20              | 27.0         | ± 17.9 | 13.7                         | ± 3.9 | 20.4                    | ± 15.1  | 20              | 25.7         | ± 14.1 | 13.8                         | ± 2.9 | 30.2                    | ± 17.0 |
| Total | 98              | 29.1         | ± 17.9 | 14.0                         | ± 4.2 | 25.7                    | ± 21.9  | 99              | 30.9         | ± 16.5 | 14.8                         | ± 4.3 | 36.4                    | ± 25.3 |

Lo treatment: Twenty *L. occidentalis* were enclosed in a plastic case with ~20 *P. thunbergii* cones.

Table S3. Features of sunken and floating seeds of *Pinus thunbergii* damaged by *Leptoglossus occidentalis*

| Feeding treatment | Tree | Sinkers      |             |      |       |    |                      | Floaters     |             |      |       |     |                      |
|-------------------|------|--------------|-------------|------|-------|----|----------------------|--------------|-------------|------|-------|-----|----------------------|
|                   |      | No. of Seeds | Weight (mg) |      | X-ray |    | Germination rate (%) | No. of Seeds | Weight (mg) |      | X-ray |     | Germination rate (%) |
|                   |      |              | Mean        | ± SD | F     | NF |                      |              | Mean        | ± SD | F     | NF  |                      |
| Lo                | A    | 5            | 20.5 ± 0.6  |      | 5     | 0  | 100                  | 10           | 7.7 ± 2.5   |      | 0     | 10  | 0                    |
|                   | B    | 3            | 22.6 ± 2.1  |      | 3     | 0  | 100                  | 24           | 10.6 ± 2.4  |      | 0     | 24  | 0                    |
|                   | C    | 5            | 22.9 ± 2.2  |      | 5     | 0  | 100                  | 24           | 10.8 ± 3.1  |      | 0     | 24  | 0                    |
|                   | D    | 2            | 24.7 ± 1.2  |      | 2     | 0  | 100                  | 24           | 9.3 ± 2.6   |      | 0     | 24  | 0                    |
|                   | E    | 13           | 25.2 ± 2.0  |      | 13    | 0  | 100                  | 24           | 12.8 ± 3.0  |      | 0     | 24  | 0                    |
| Total (Lo)        |      | 28           | 23.0 ± 2.4  |      | 28    | 0  | 100                  | 106          | 10.4 ± 2.7  |      | 0     | 106 | 0                    |
| Control           | A    | 6            | 19.4 ± 2.1  |      | 6     | 0  | 100                  | 3            | 8.2 ± 1.9   |      | 0     | 3   | 0                    |
|                   | B    | 11           | 21.4 ± 1.4  |      | 11    | 0  | 100                  | 24           | 10.5 ± 2.5  |      | 0     | 24  | 0                    |
|                   | C    | 19           | 24.9 ± 1.6  |      | 19    | 0  | 95                   | 24           | 10.9 ± 2.4  |      | 0     | 24  | 0                    |
|                   | D    | 6            | 21.0 ± 1.3  |      | 6     | 0  | 83                   | 18           | 9.0 ± 2.8   |      | 0     | 18  | 0                    |
|                   | E    | 24           | 22.4 ± 1.8  |      | 24    | 0  | 100                  | 24           | 11.2 ± 2.9  |      | 0     | 24  | 0                    |
| Total (Control)   |      | 66           | 23.6 ± 2.5  |      | 66    | 0  | 96                   | 93           | 10.5 ± 3.1  |      | 0     | 93  | 0                    |
| Total             |      | 94           | 22.9 ± 2.5  |      | 94    | 0  | 98                   | 199          | 10.5 ± 2.9  |      | 0     | 199 | 0                    |

Number of filled seeds (F) and number of nonfilled seeds (NF) classified based on X-ray photos.
