# Supplementary material
Source: publisher figshare collection journal article supplement (https://tandf.figshare.com/articles/dataset/_/24792569)
Supplement: Supplementary file 2 [file 1]

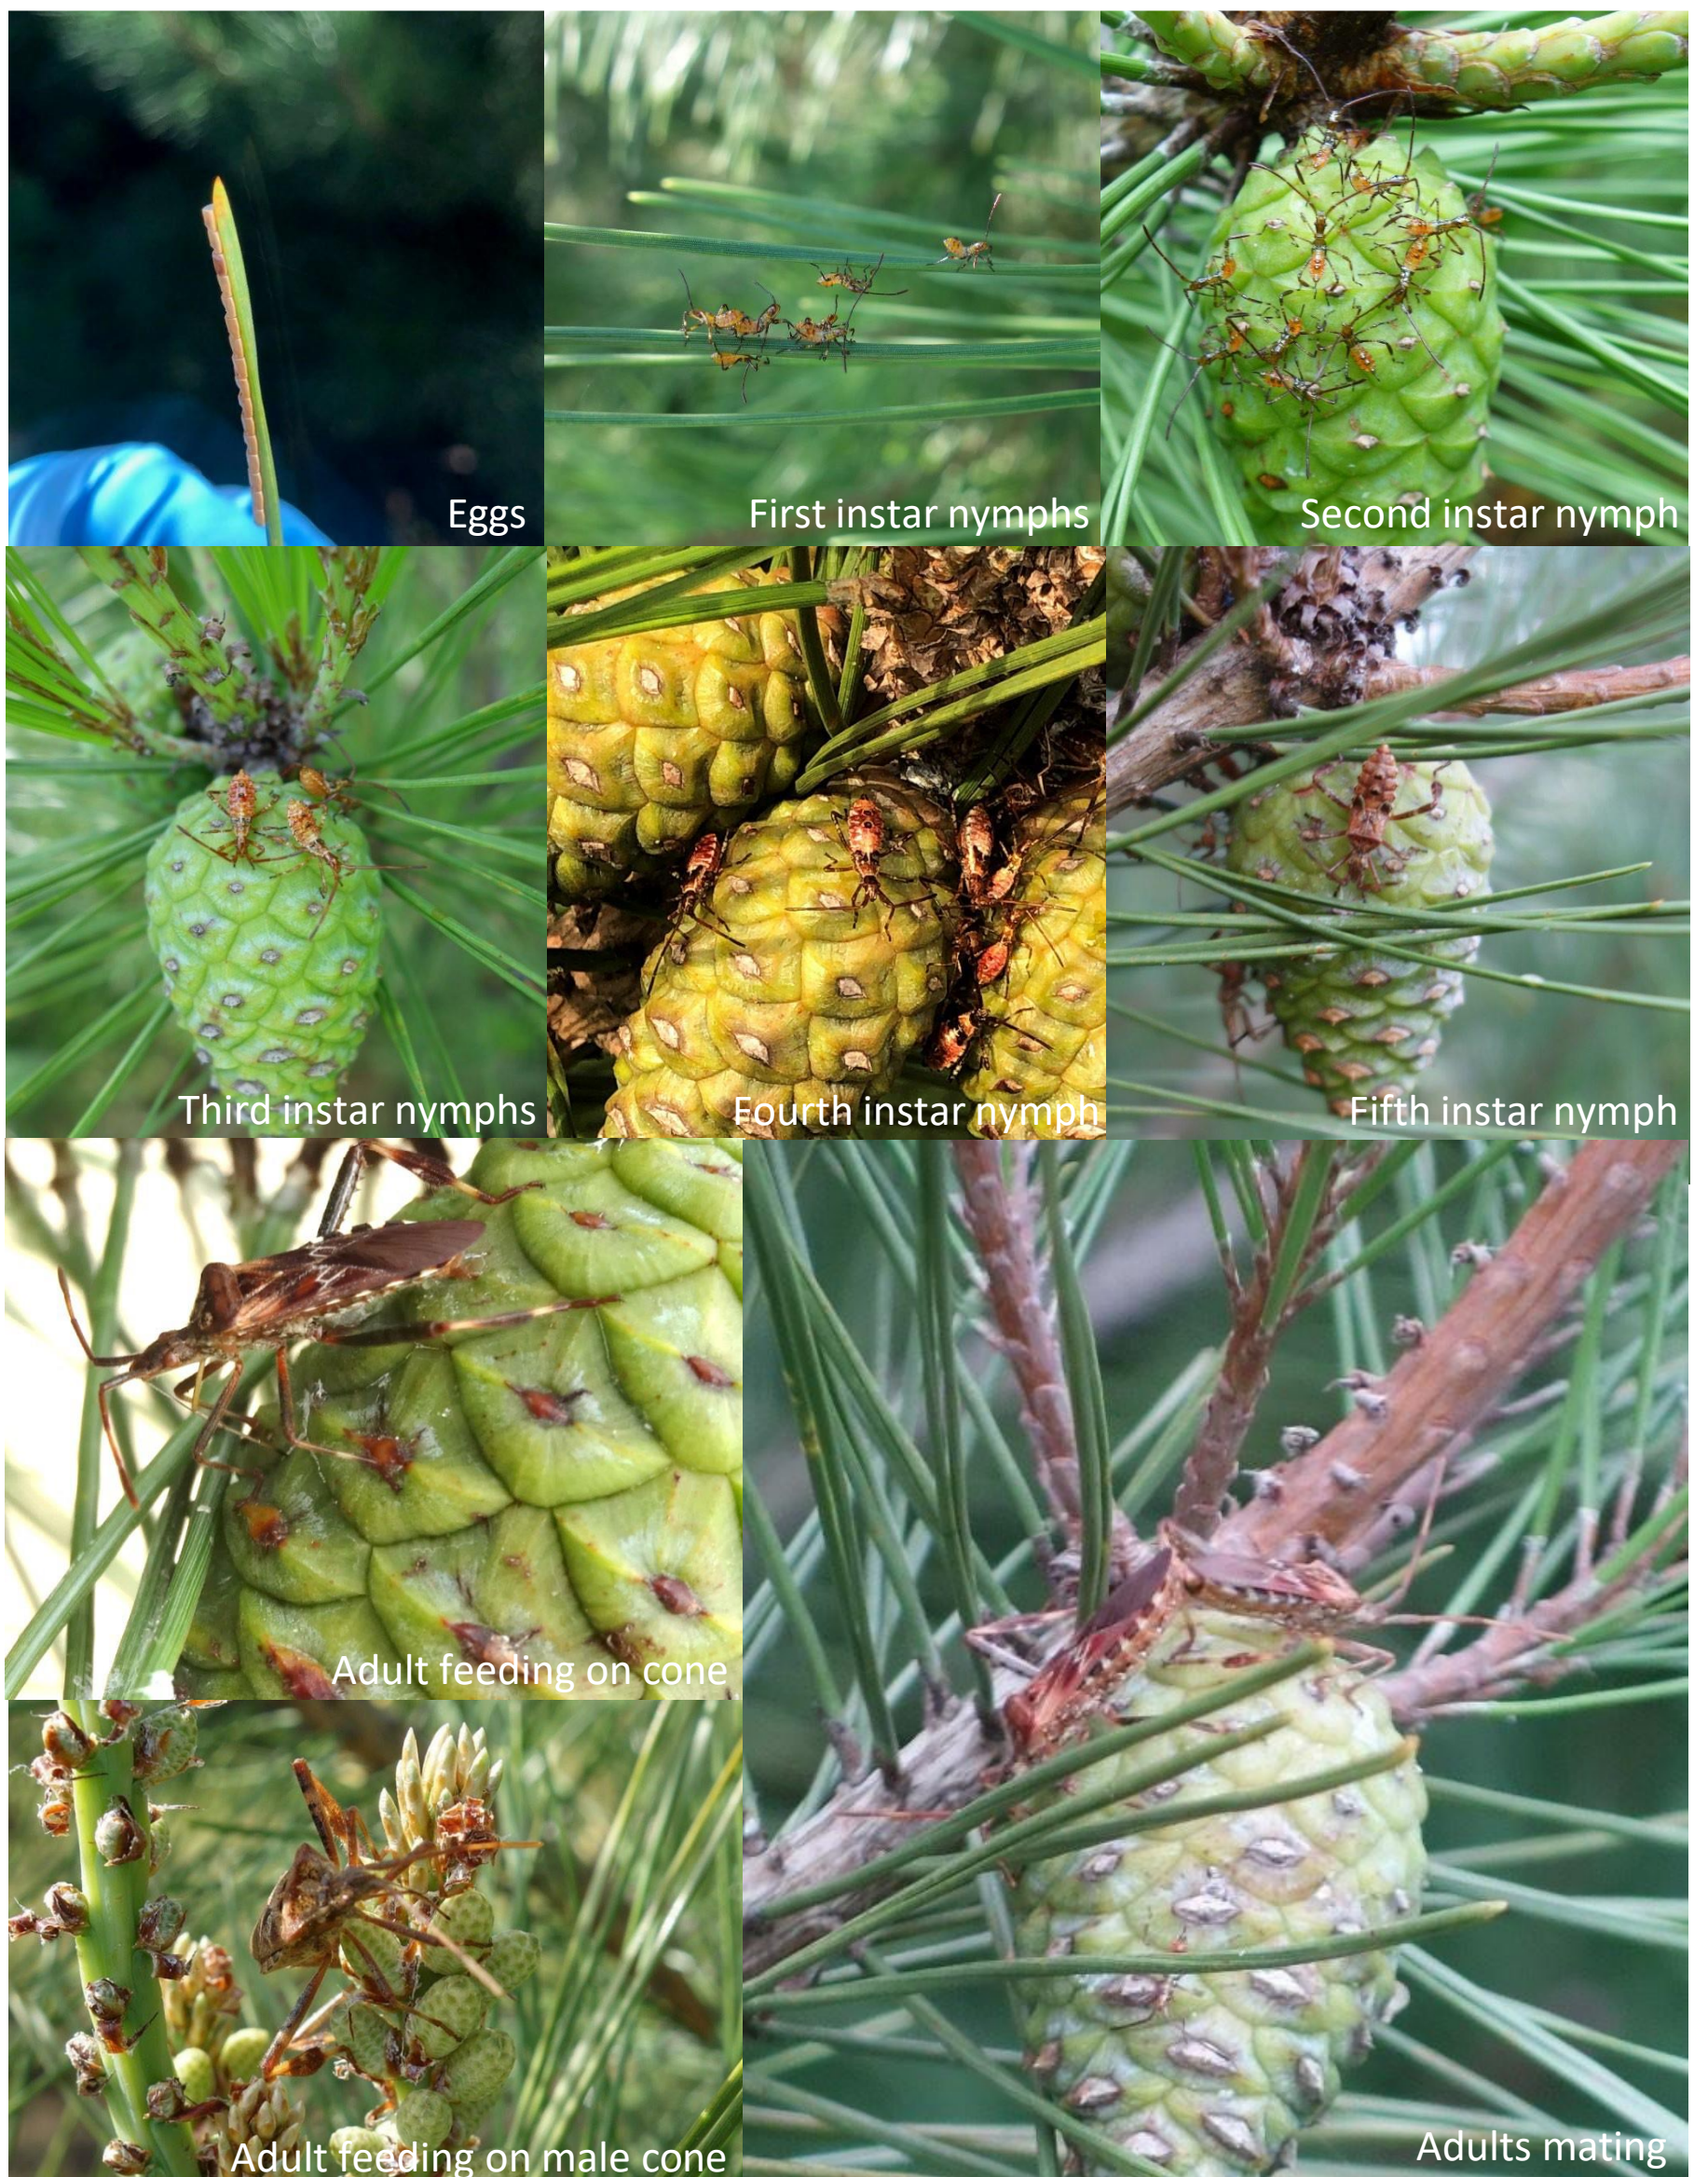

**Figure S1.** *Leptoglossus occidentalis* observed at the Kyushu Regional Breeding Office, Forest Tree Breeding Centre, located in Kumamoto Prefecture.
